# Supplementary figures and images for: Challenging the conventional wisdom: Re‐evaluating Smpd3's role in extracellular vesicle biogenesis
Source: PubMed Central journal article supplement — J Extracell Biol. 2024 Nov 8;3(11):e70015. doi: 10.1002/jex2.70015 (PMC11544639; doi:10.1002/jex2.70015), 2024-11-08

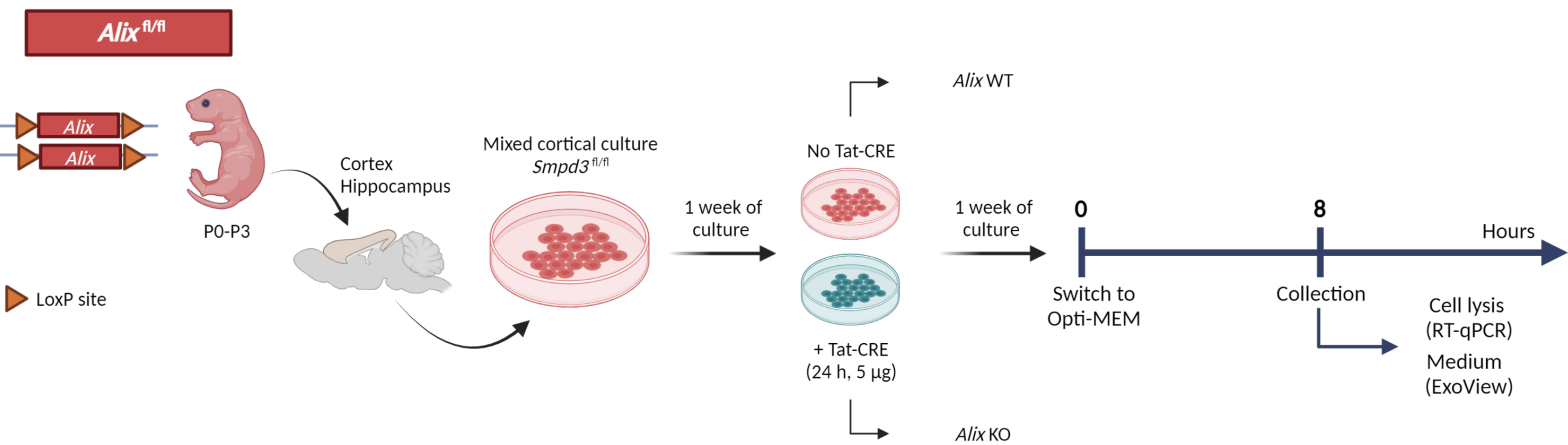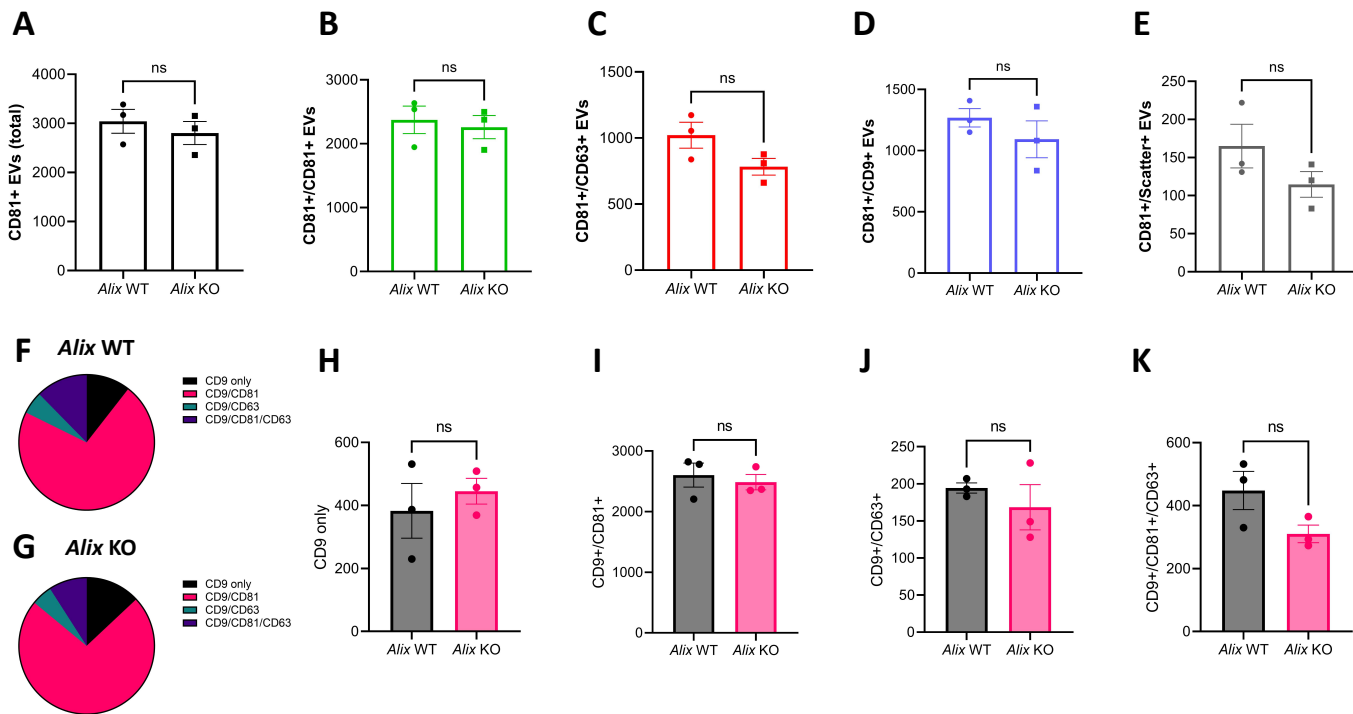

Supplement: JEX2-3-e70015-s001.pdf [file JEX2-3-e70015-s001.pdf]

Smpd3  
exon 3

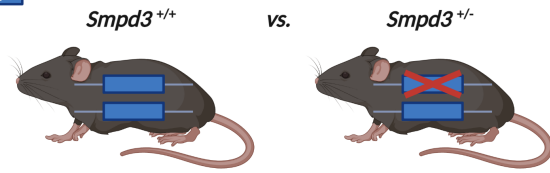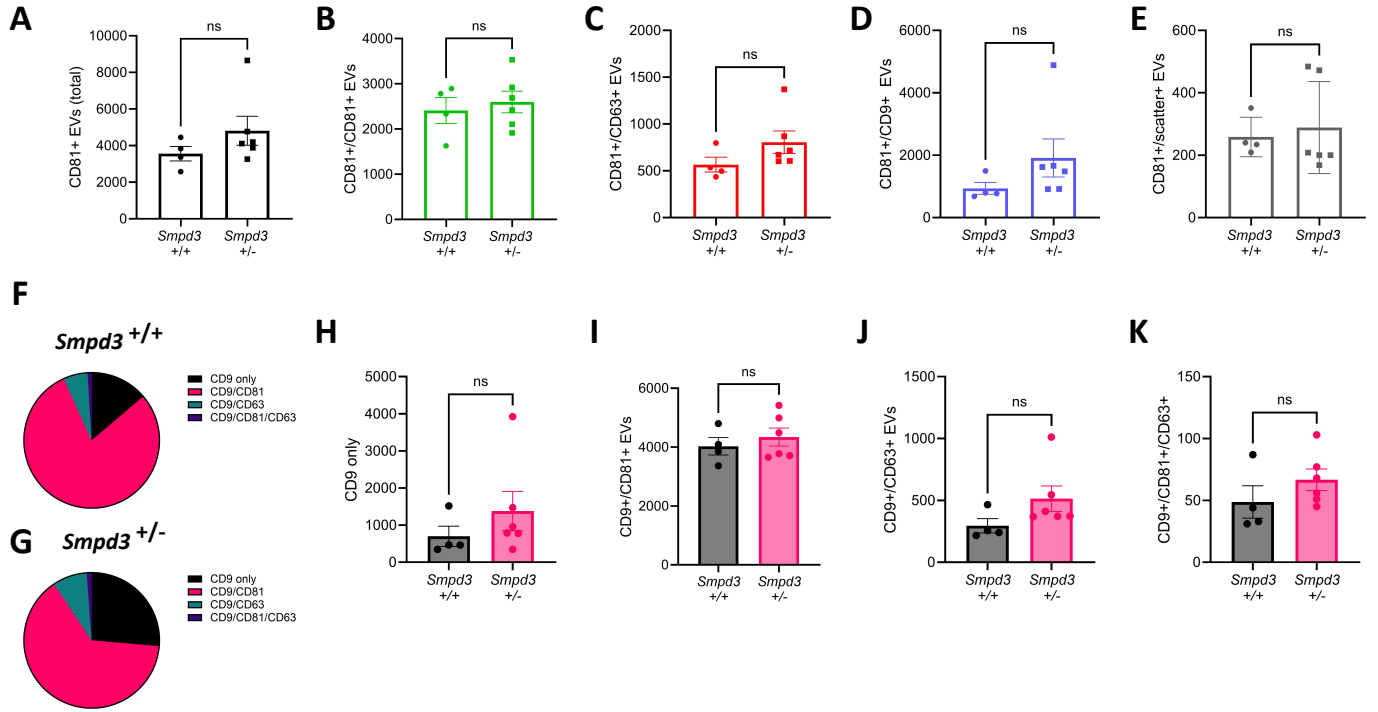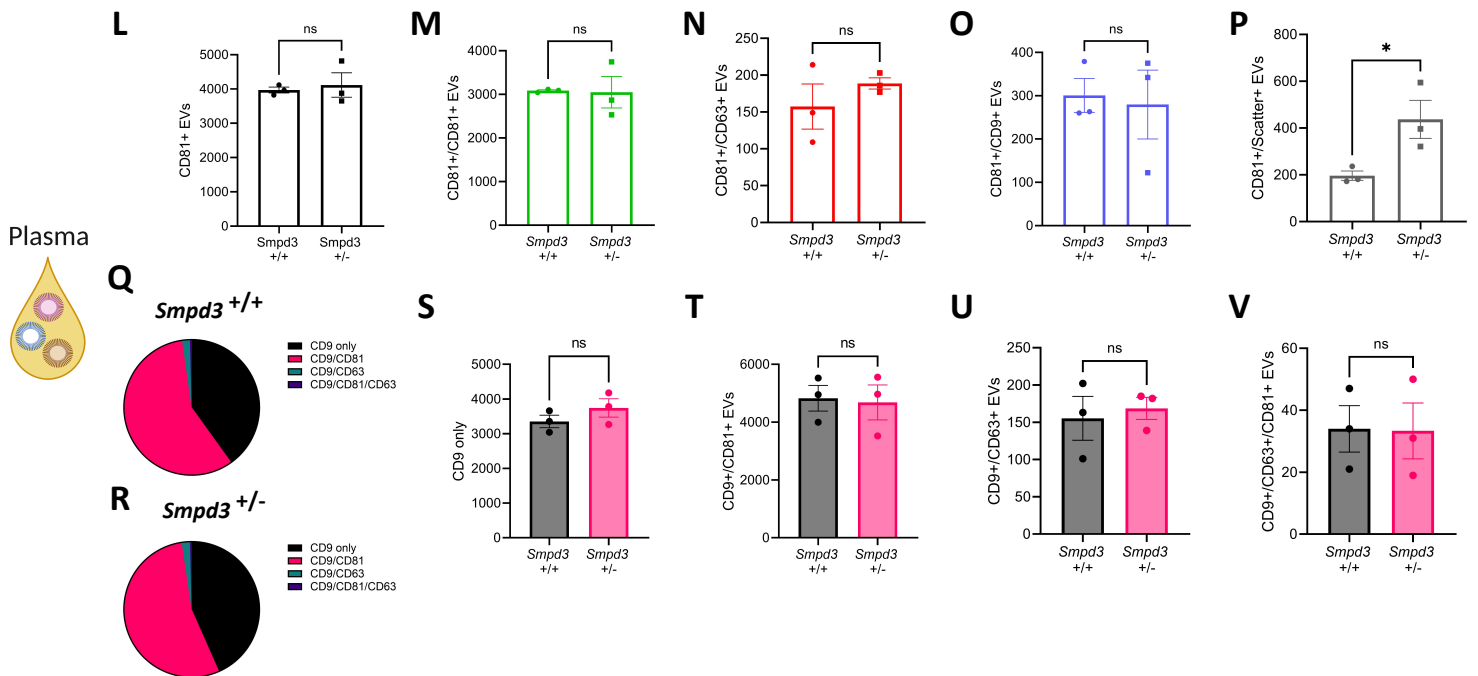

Supplement: JEX2-3-e70015-s002.pdf [file JEX2-3-e70015-s002.pdf]

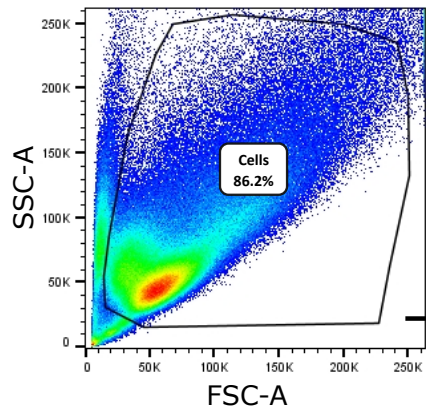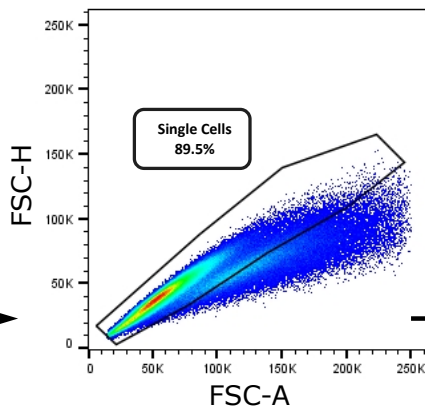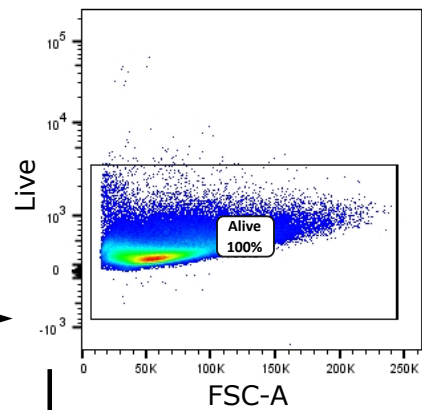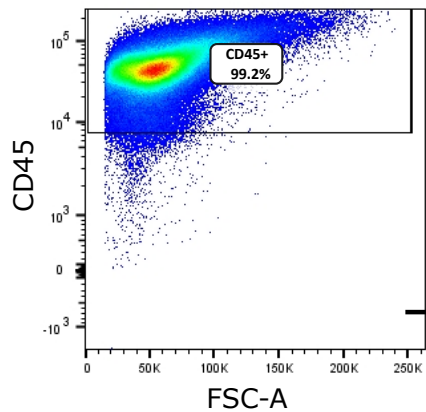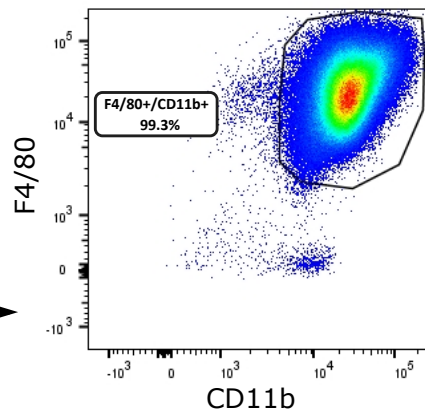

Supplement: JEX2-3-e70015-s003.pdf [file JEX2-3-e70015-s003.pdf]

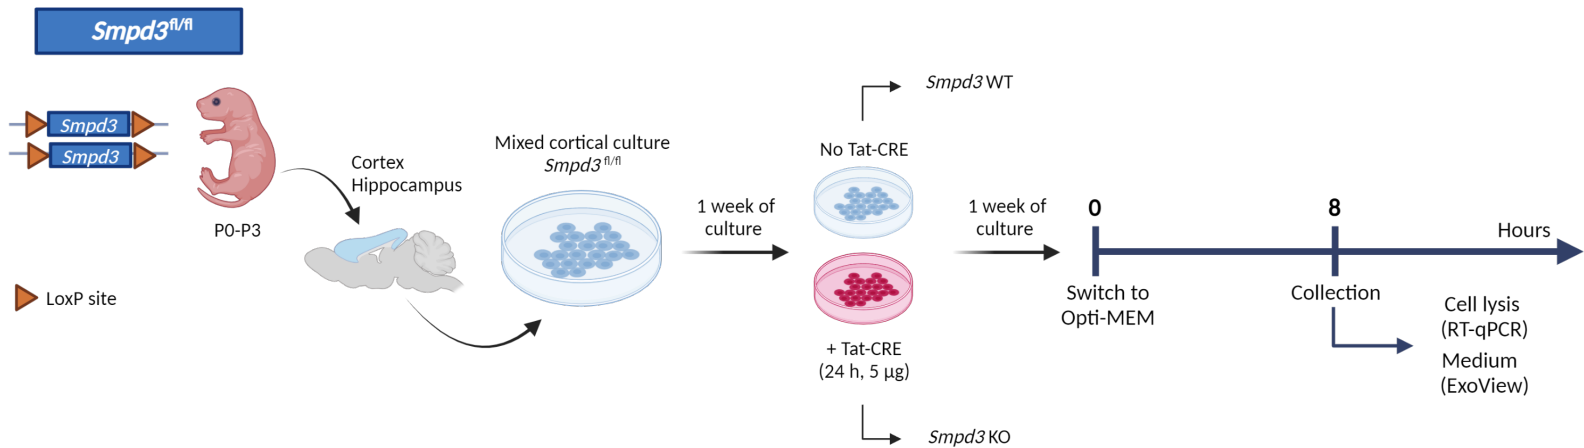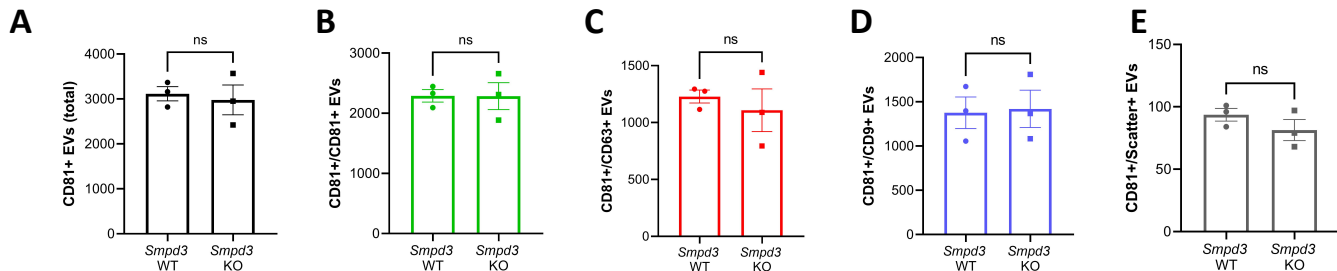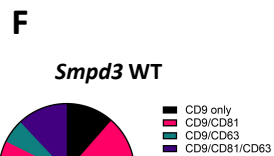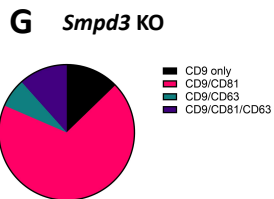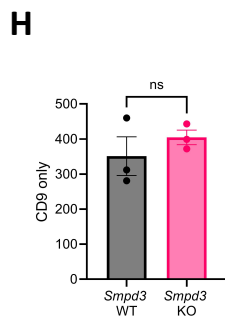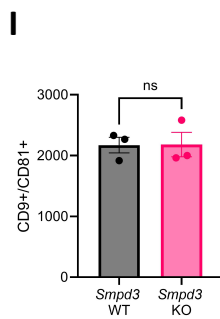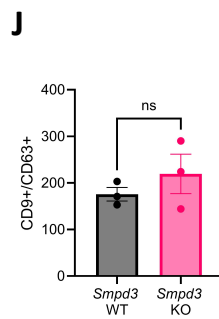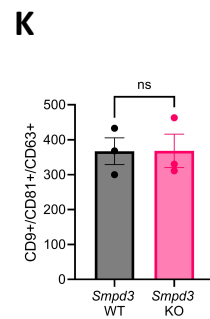

Supplement: JEX2-3-e70015-s004.pdf [file JEX2-3-e70015-s004.pdf]

*Smpd3*<sup>fl/fl</sup> x *LysM-Cre*<sup>Tg/+</sup>

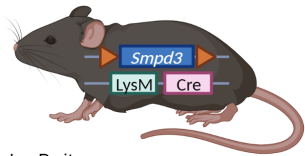

LoxP site

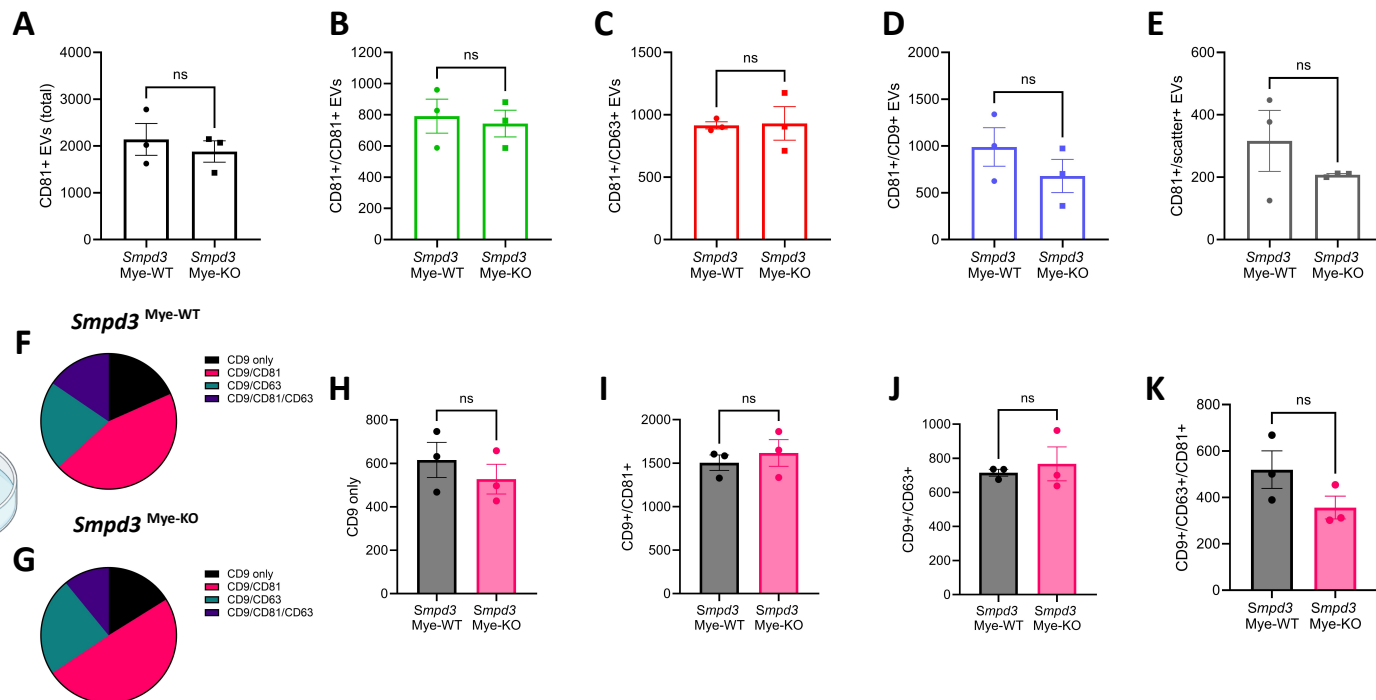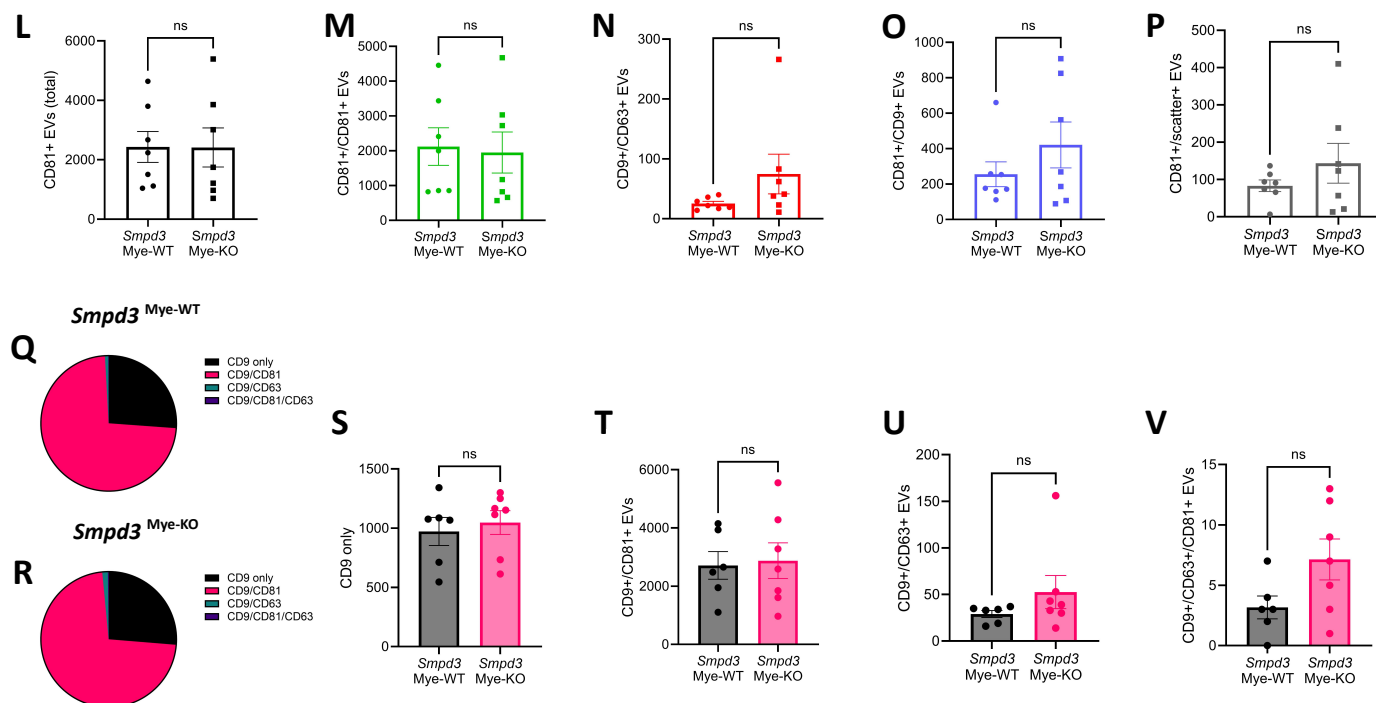

Supplement: JEX2-3-e70015-s005.pdf [file JEX2-3-e70015-s005.pdf]

*Alix*<sup>fl/fl</sup> x *LysM-Cre*<sup>Tg/+</sup>

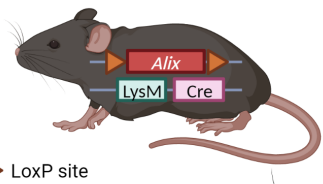

▶ LoxP site

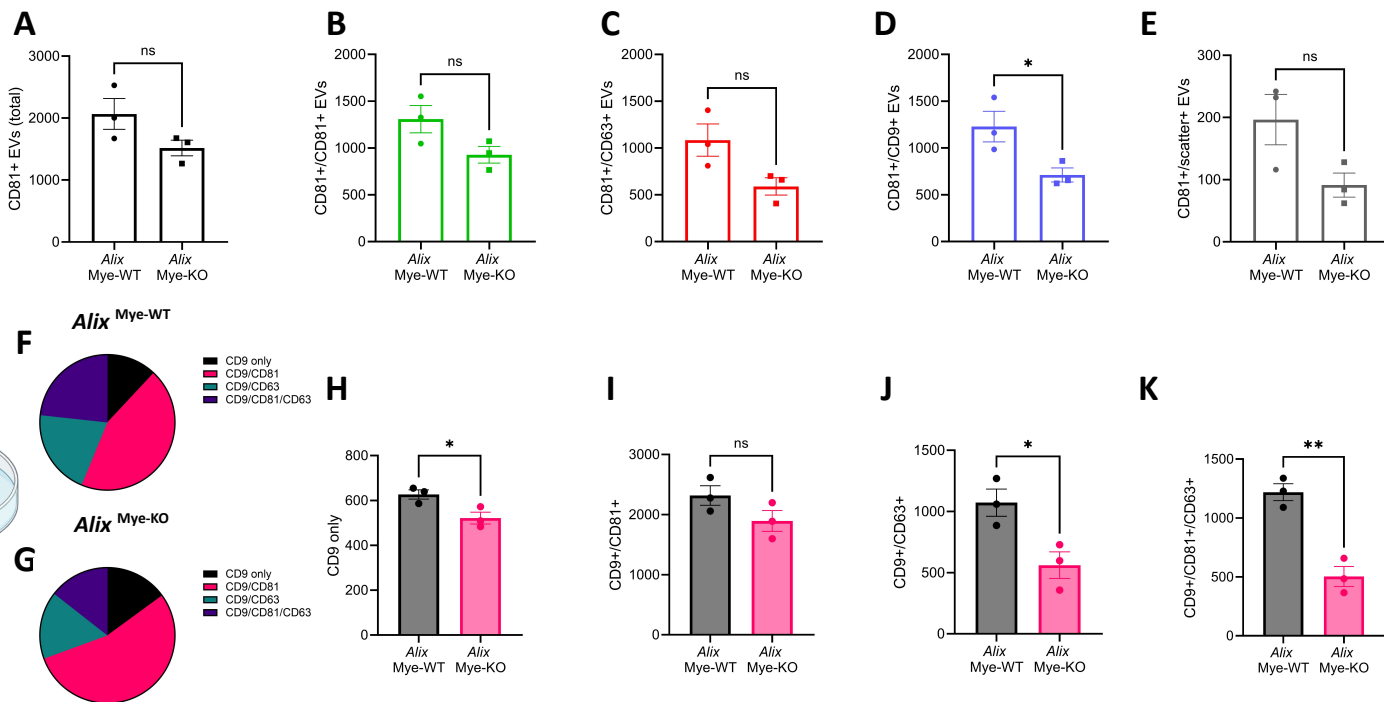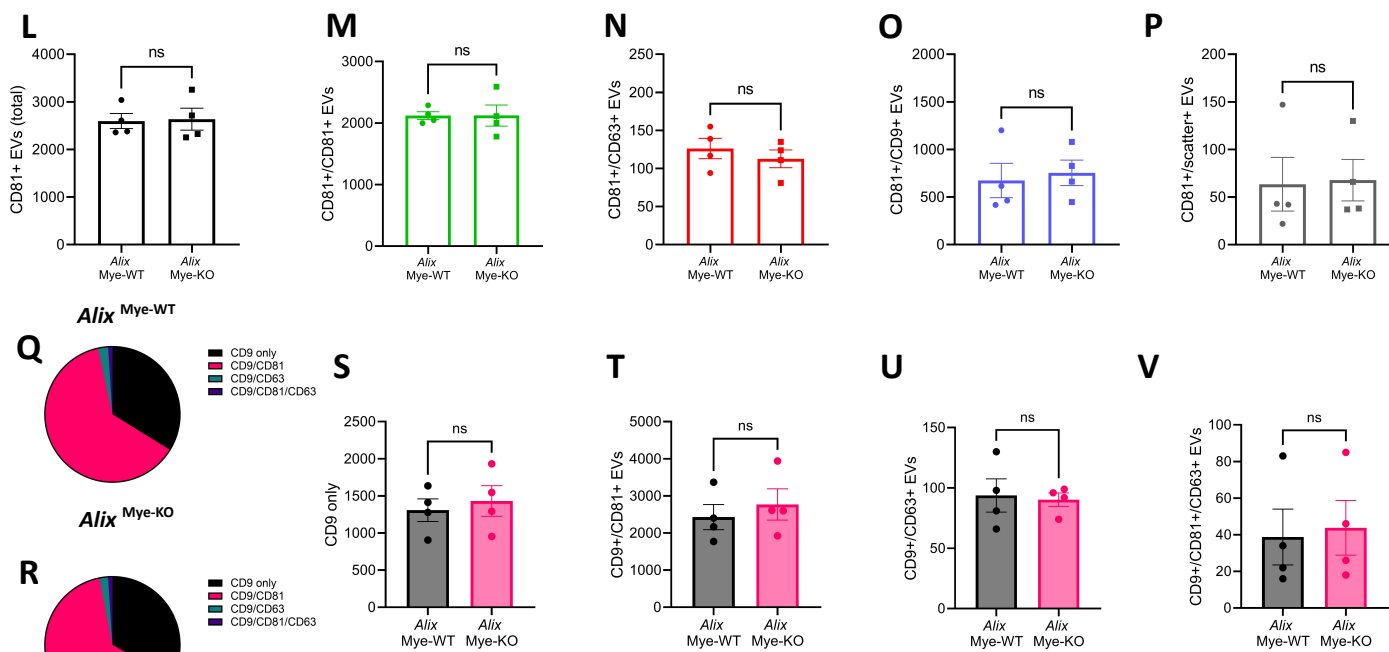

Supplement: JEX2-3-e70015-s006.pdf [file JEX2-3-e70015-s006.pdf]
